# Supplementary material
Source: PubMed Central journal article supplement (PMC3162318)
Supplement: NIHMS287272-supplement-Table_S1.pdf [file NIHMS287272-supplement-Table_S1.pdf]

**Table S1. Criteria for flagging series for potential liabilities**

| Liability                          | Reference Assay Activity                                                                                        | PubChem Assay ID <sup>1</sup> |
|------------------------------------|-----------------------------------------------------------------------------------------------------------------|-------------------------------|
| Fluorescence/absorbance            | Concentration dependent changes in total fluorescence in FP assay                                               | 1479                          |
| Promiscuous aggregation            | Selectively active in the detergent free Cruzain assay                                                          | 2383                          |
| Promiscuous redox activity         | Active in the caspase-1 or caspase-7 assay                                                                      | 2389, 889                     |
| Low potency                        | FP assay: >20 $\mu$ M                                                                                           | 1469                          |
| Low efficacy                       | FP assay: <50%                                                                                                  | 1469                          |
| Low percentage of active compounds | FP assay: significantly lower actives compared to mean actives in all series (Fisher's exact test: $P < 0.05$ ) | 1469                          |
| Promiscuous activity               | >100 in house assays: <sup>2</sup> promiscuity score >0.5                                                       |                               |

<sup>1</sup><http://www.ncbi.nlm.nih.gov/pcassay>

<sup>2</sup>Promiscuity score was calculated using the formula:  $(2N_{\text{active}} + N_{\text{inconclusive}}) / N_{\text{tested}}$ , where  $N_{\text{active}}$  denotes the number of assays where a compound was active,  $N_{\text{inconclusive}}$  denotes the number of assays where a compound showed inconclusive activity and  $N_{\text{tested}}$  denotes the total number of assays a compound was tested.
