# Supplementary material
Source: PubMed Central journal article supplement (PMC3162318)
Supplement: NIHMS287272-supplement-Table_S2.pdf [file NIHMS287272-supplement-Table_S2.pdf]

**Table S2. Potency and efficacy of follow up compounds**

| #  | ID              | Series <sup>1</sup> | qHTS                              |                       | Retest                                 |               |                                        |               |                                                       | Confirmation                           |               |                                        |               |
|----|-----------------|---------------------|-----------------------------------|-----------------------|----------------------------------------|---------------|----------------------------------------|---------------|-------------------------------------------------------|----------------------------------------|---------------|----------------------------------------|---------------|
|    |                 |                     | $\mu\text{M}$<br>IC <sub>50</sub> | %<br>Eff <sup>2</sup> | $\mu\text{M}$<br>IC <sub>50</sub><br>R | %<br>Eff<br>R | $\mu\text{M}$<br>IC <sub>50</sub><br>G | %<br>Eff<br>G | $\mu\text{M}$<br>IC <sub>50</sub><br>Tox <sup>3</sup> | $\mu\text{M}$<br>IC <sub>50</sub><br>R | %<br>Eff<br>R | $\mu\text{M}$<br>IC <sub>50</sub><br>G | %<br>Eff<br>G |
| 1  | MLS000517530-01 | 1                   | 14                                | -50                   | 10                                     | -80           | 8                                      | -56           | -                                                     | 5                                      | -75           | 4                                      | -72           |
| 2  | MLS000389544-01 | 1                   | 36                                | -69                   | 22                                     | -99           | 10                                     | -81           | -                                                     | 5                                      | -96           | 5                                      | -92           |
| 3  | MLS000517219-01 | 1                   | -                                 | -                     | 4*                                     | -43           | -                                      | -             | -                                                     | -                                      | -             | -                                      | -             |
| 4  | MLS000565365-01 | 2                   | 22                                | -33                   | 45                                     | -53           | 25                                     | -83           | -                                                     | -                                      | -             | -                                      | -             |
| 5  | MLS000043700-01 | 2                   | 25                                | -52                   | 16                                     | -95           | 9*                                     | -89           | -                                                     | -                                      | -             | -                                      | -             |
| 6  | MLS000043701-01 | 2                   | -                                 | -                     | 45                                     | -90           | 28*                                    | -74           | -                                                     | -                                      | -             | -                                      | -             |
| 7  | NCGC00183215-01 | 2                   | -                                 | -                     | -                                      | -             | -                                      | -             | -                                                     | -                                      | -             | 34*                                    | -124          |
| 8  | MLS000678325-01 | 3                   | 18                                | -31                   | 40                                     | -78           | †                                      | †             | -                                                     | 32*                                    | -161          | -                                      | -             |
| 9  | MLS000566850-01 | 3                   | -                                 | -                     | -                                      | -             | -                                      | -             | -                                                     | -                                      | -             | -                                      | -             |
| 10 | MLS000374995-01 | 4                   | 40                                | -58                   | †                                      | †             | -                                      | -             | -                                                     | -                                      | -             | -                                      | -             |
| 11 | MLS000051497-01 | 5                   | 36                                | -61                   | †                                      | †             | -                                      | -             | -                                                     | -                                      | -             | -                                      | -             |
| 12 | MLS001003683-01 | 6                   | 32                                | -37                   | 92*                                    | -69           | 79*                                    | -66           | -                                                     | -                                      | -             | -                                      | -             |
| 13 | MLS000592203-01 | 7                   | 36                                | -64                   | -                                      | -             | -                                      | -             | -                                                     | -                                      | -             | -                                      | -             |
| 14 | NCGC00123501-01 | 8                   | 0.8*                              | -35                   | -                                      | -             | -                                      | -             | -                                                     | -                                      | -             | -                                      | -             |
| 15 | MLS000566126-01 | 9                   | 1                                 | -47                   | -                                      | -             | †                                      | †             | -                                                     | -                                      | -             | -                                      | -             |
| 16 | MLS000097492-01 | 9                   | 32                                | -47                   | 92*                                    | -81           | 40                                     | -60           | -                                                     | -                                      | -             | -                                      | -             |
| 17 | MLS000391116-01 | 9                   | -                                 | -                     | -                                      | -             | -                                      | -             | -                                                     | -                                      | -             | -                                      | -             |
| 18 | MLS000554429-01 | 10                  | 32                                | -56                   | †                                      | †             | 79                                     | -56           | -                                                     | -                                      | -             | -                                      | -             |
| 19 | MLS000554947-01 | 10                  | 45                                | -35                   | 56                                     | -82           | 50*                                    | -44           | -                                                     | -                                      | -             | -                                      | -             |
| 20 | MLS000526361-01 | 10                  | 25*                               | -60                   | †                                      | †             | †                                      | †             | -                                                     | -                                      | -             | -                                      | -             |
| 21 | MLS000042510-01 | 11                  | 36                                | -62                   | 92                                     | -41           | -                                      | -             | -                                                     | -                                      | -             | -                                      | -             |
| 22 | MLS000718932-01 | 12                  | 2                                 | -38                   | 1                                      | -50           | †                                      | †             | 3                                                     | -                                      | -             | -                                      | -             |
| 23 | MLS000768805-01 | 12                  | -                                 | -                     | -                                      | -             | -                                      | -             | -                                                     | -                                      | -             | -                                      | -             |
| 24 | MLS000858701-01 | 13                  | 4                                 | -39                   | 32                                     | -52           | 92                                     | -47           | -                                                     | -                                      | -             | -                                      | -             |
| 25 | MLS000588660-01 | 14                  | 4                                 | -43                   | †                                      | †             | †                                      | †             | -                                                     | -                                      | -             | -                                      | -             |
| 26 | MLS000557855-01 | 14                  | 14                                | -44                   | 89                                     | -81           | 36*                                    | -46           | -                                                     | -                                      | -             | -                                      | -             |
| 27 | MLS000595296-01 | 14                  | -                                 | -                     | -                                      | -             | -                                      | -             | -                                                     | -                                      | -             | -                                      | -             |
| 28 | MLS000030506-01 | 15                  | 9                                 | -33                   | †                                      | †             | -                                      | -             | -                                                     | -                                      | -             | -                                      | -             |
| 29 | MLS000763081-01 | 16                  | 11                                | -41                   | 92                                     | -72           | 32                                     | -46           | -                                                     | -                                      | -             | -                                      | -             |
| 30 | MLS000339510-01 | 17                  | 36                                | -100                  | †                                      | †             | -                                      | -             | -                                                     | -                                      | -             | -                                      | -             |
| 31 | MLS000587883-01 | 18                  | 0.01                              | -32                   | †                                      | †             | -                                      | -             | -                                                     | -                                      | -             | -                                      | -             |
| 32 | MLS000736037-01 | 19                  | 32                                | -41                   | 92                                     | -78           | †                                      | †             | -                                                     | -                                      | -             | -                                      | -             |
| 33 | MLS000086665-01 | 20                  | 0.1                               | -33                   | †                                      | †             | -                                      | -             | -                                                     | -                                      | -             | -                                      | -             |
| 34 | NCGC00126685-01 | 21                  | 6*                                | -34                   | -                                      | -             | -                                      | -             | -                                                     | -                                      | -             | -                                      | -             |
| 35 | NCGC00098234-01 | 22                  | 4*                                | -11                   | †                                      | †             | -                                      | -             | -                                                     | -                                      | -             | -                                      | -             |
| 36 | MLS000737424-01 | 23                  | 11                                | -46                   | 92                                     | -79           | 32*                                    | -40           | 25                                                    | -                                      | -             | -                                      | -             |
| 37 | NCGC00094767-01 | 23                  | -                                 | -                     | †                                      | †             | -                                      | -             | 31                                                    | -                                      | -             | -                                      | -             |
| 38 | MLS000073645-01 | 23                  | 28*                               | -93                   | 89                                     | -63           | 20                                     | -49           | -                                                     | -                                      | -             | -                                      | -             |
| 39 | NCGC00115663-01 | 24                  | 32*                               | -54                   | -                                      | -             | -                                      | -             | -                                                     | -                                      | -             | -                                      | -             |
| 40 | MLS000775306-01 | 25                  | 14                                | -35                   | -                                      | -             | †                                      | †             | -                                                     | -                                      | -             | -                                      | -             |
| 41 | MLS000775307-01 | 25                  | -                                 | -                     | †                                      | †             | -                                      | -             | -                                                     | -                                      | -             | -                                      | -             |
| 42 | MLS000394821-01 | 25                  | 40*                               | -77                   | -                                      | -             | -                                      | -             | -                                                     | -                                      | -             | -                                      | -             |
| 43 | MLS000580791-01 | 26                  | 25                                | -40                   | †                                      | †             | 79                                     | -45           | -                                                     | -                                      | -             | -                                      | -             |
| 44 | MLS000532367-01 | 27                  | 28                                | -33                   | 45                                     | -86           | 28                                     | -44           | -                                                     | -                                      | -             | -                                      | -             |
| 45 | NCGC00016896-01 | 28                  | 17                                | -32                   | 92                                     | -62           | †                                      | †             | -                                                     | -                                      | -             | -                                      | -             |

| #  | ID              | Series <sup>1</sup> | qHTS                              |                       | Retest                                 |            |                                        |            |                                                       | Confirmation                           |            |                                        |               |   |
|----|-----------------|---------------------|-----------------------------------|-----------------------|----------------------------------------|------------|----------------------------------------|------------|-------------------------------------------------------|----------------------------------------|------------|----------------------------------------|---------------|---|
|    |                 |                     | $\mu\text{M}$<br>IC <sub>50</sub> | %<br>Eff <sup>2</sup> | $\mu\text{M}$<br>IC <sub>50</sub><br>R | % Eff<br>R | $\mu\text{M}$<br>IC <sub>50</sub><br>G | % Eff<br>G | $\mu\text{M}$<br>IC <sub>50</sub><br>Tox <sup>3</sup> | $\mu\text{M}$<br>IC <sub>50</sub><br>R | %<br>Eff R | $\mu\text{M}$<br>IC <sub>50</sub><br>G | %<br>Eff<br>G |   |
| 46 | MLS000069829-01 | 28                  | -                                 | -                     |                                        |            |                                        |            |                                                       |                                        |            |                                        |               |   |
| 47 | MLS000333070-01 | 29                  | 40                                | -54                   | †                                      | †          | -                                      | -          | -                                                     |                                        |            |                                        |               |   |
| 48 | MLS000588145-01 | 30                  | 18*                               | -126                  | †                                      | †          | -                                      | -          | -                                                     |                                        |            |                                        |               |   |
| 49 | MLS000040484-01 | 31                  | 7                                 | -40                   | -                                      | -          | -                                      | -          | -                                                     |                                        |            |                                        |               |   |
| 50 | MLS000332102-01 | 31                  | -                                 | -                     | -                                      | -          | -                                      | -          | -                                                     |                                        |            |                                        |               |   |
| 51 | MLS001010770-01 | 32                  | 36                                | -53                   | 79                                     | -121       | -                                      | -          | -                                                     |                                        |            |                                        |               |   |
| 52 | MLS000591766-01 | 33                  | 40                                | -51                   | 40                                     | -71        | 13                                     | -41        | -                                                     |                                        |            |                                        |               |   |
| 53 | MLS000549845-01 | 34                  | 32                                | -77                   | -                                      | -          | -                                      | -          | -                                                     |                                        |            |                                        |               |   |
| 54 | MLS000051772-01 | 35                  | 32                                | -54                   | 50                                     | -99        | 20                                     | -71        | -                                                     |                                        |            |                                        |               |   |
| 55 | NCGC00168048-01 | 36                  | 14                                | -49                   | 92*                                    | -231       | 40*                                    | -229       | 8                                                     |                                        |            |                                        |               |   |
| 56 | MLS000594813-01 | 37                  | 18                                | -45                   | †                                      | †          | 45                                     | -51        | -                                                     |                                        |            |                                        |               |   |
| 57 | MLS000038680-01 | 37                  | 25                                | -65                   | †                                      | †          | -                                      | -          | -                                                     |                                        |            |                                        |               |   |
| 58 | MLS000038679-01 | 37                  | 36                                | -76                   | †                                      | †          | 56                                     | -43        | -                                                     |                                        |            |                                        |               |   |
| 59 | MLS000710923-01 | 38                  | 6                                 | -76                   | 7                                      | -124       | 4                                      | -79        | -                                                     |                                        |            |                                        |               |   |
| 60 | MLS000069532-01 | 38                  | 16                                | -40                   | 8                                      | -113       | 3                                      | -92        | -                                                     |                                        |            |                                        |               |   |
| 61 | MLS000774398-01 | 39                  | 32                                | -91                   | 9                                      | -83        | 6                                      | -85        | -                                                     |                                        |            |                                        |               |   |
| 62 | MLS000850935-01 | 39                  | 32                                | -74                   | 50                                     | -103       | 50                                     | -88        | -                                                     |                                        |            |                                        |               |   |
| 63 | MLS001029609-01 | 40                  | 11                                | -32                   | 50                                     | -103       | 32                                     | -57        | -                                                     |                                        |            |                                        |               |   |
| 64 | MLS000391126-01 | 40                  | 36                                | -56                   | 45                                     | -101       | 10                                     | -44        | -                                                     |                                        |            |                                        |               |   |
| 65 | MLS000334232-01 | 40                  | 45                                | -53                   | 40                                     | -96        | 40                                     | -79        | -                                                     |                                        |            |                                        |               |   |
| 66 | MLS000071484-01 | 41                  | 36                                | -59                   | 32*                                    | -83        | 8*                                     | -42        | -                                                     |                                        |            |                                        |               |   |
| 67 | MLS000541038-01 | 41                  | 71                                | -67                   | 40*                                    | -115       | 32*                                    | -71        | -                                                     |                                        |            |                                        |               |   |
| 68 | MLS000026910-01 | 41                  | 36*                               | -69                   | 40*                                    | -91        | 32                                     | -57        | -                                                     |                                        |            |                                        |               |   |
| 69 | MLS000555090-01 | 41                  | 40*                               | -56                   | 36*                                    | -122       | 13                                     | -62        | -                                                     |                                        |            |                                        |               |   |
| 70 | MLS000106099-01 | 41                  | 50*                               | -71                   | 25*                                    | -72        | 20*                                    | -46        | -                                                     |                                        |            |                                        |               |   |
| 71 | NCGC00100433-01 | 42a                 | 14                                | -45                   | 92                                     | -97        | 79                                     | -65        | -                                                     |                                        |            |                                        |               |   |
| 72 | NCGC00100429-01 | 42a                 | 56                                | -46                   | 50                                     | -81        | 20                                     | -60        | -                                                     |                                        |            |                                        |               |   |
| 73 | MLS000531260-01 | 42a                 | 71                                | -54                   | 92                                     | -96        | 36                                     | -58        | -                                                     |                                        |            |                                        |               |   |
| 74 | MLS000531050-01 | 42a                 | 79                                | -49                   | †                                      | †          | †                                      | †          | -                                                     |                                        |            |                                        |               |   |
| 75 | NCGC00100427-01 | 42a                 | -                                 | -                     | 92                                     | -51        | 79                                     | -52        | -                                                     |                                        |            |                                        |               |   |
| 76 | MLS000540052-01 | 42b                 | 4                                 | -38                   | 79                                     | -43        | 79                                     | -54        | -                                                     |                                        |            |                                        |               |   |
| 77 | MLS000592130-01 | 42b                 | -                                 | -                     | 92                                     | -60        | 32                                     | -41        | -                                                     |                                        |            |                                        |               |   |
| 78 | MLS000123832-01 | 42c                 | 14                                | -66                   | 56                                     | -68        | 36                                     | -41        | -                                                     |                                        |            |                                        |               |   |
| 79 | MLS000715671-01 | 42c                 | 22                                | -34                   | 16                                     | -58        | †                                      | †          | -                                                     | -                                      | -          | -                                      | -             | - |
| 80 | MLS000715977-01 | 42c                 | -                                 | -                     | 92                                     | -73        | 32                                     | -49        | -                                                     |                                        |            |                                        |               |   |
| 81 | MLS000833701-01 | 42d                 | 36                                | -42                   | -                                      | -          | -                                      | -          | -                                                     |                                        |            |                                        |               |   |
| 82 | MLS000064439-01 | 42e                 | 25                                | -64                   | -                                      | -          | -                                      | -          | -                                                     |                                        |            |                                        |               |   |
| 83 | MLS000389027-01 | 42f                 | 14                                | -39                   | -                                      | -          | -                                      | -          | -                                                     |                                        |            |                                        |               |   |
| 84 | MLS000736512-01 | S1                  | 22                                | -44                   | 11                                     | -63        | 4                                      | -45        | -                                                     | 37*                                    | -169       | 4                                      | -29           |   |
| 85 | MLS000035420-01 | S2                  | 32                                | -81                   | †                                      | †          | 56                                     | -57        | -                                                     |                                        |            |                                        |               |   |
| 86 | MLS000037143-01 | S3                  | 50                                | -58                   | 92                                     | -135       | 89*                                    | -64        | 18                                                    |                                        |            |                                        |               |   |
| 87 | MLS000107641-01 | S4                  | 40                                | -45                   | 45*                                    | -124       | 14*                                    | -192       | -                                                     |                                        |            |                                        |               |   |
| 88 | MLS000334609-01 | S5                  | 36*                               | -60                   | †                                      | †          | -                                      | -          | -                                                     |                                        |            |                                        |               |   |
| 89 | MLS000530477-01 | S6                  | 16                                | -51                   | †                                      | †          | †                                      | †          | -                                                     |                                        |            |                                        |               |   |
| 90 | MLS000532711-01 | S7                  | 40                                | -48                   | †                                      | †          | -                                      | -          | -                                                     |                                        |            |                                        |               |   |
| 91 | MLS000533245-01 | S8                  | 28                                | -71                   | 92                                     | -63        | -                                      | -          | -                                                     |                                        |            |                                        |               |   |

| #   | ID              | Series <sup>1</sup> | qHTS                              |                       | Retest                                 |            |                                        |            |                                                       | Confirmation                           |            |                                        |               |
|-----|-----------------|---------------------|-----------------------------------|-----------------------|----------------------------------------|------------|----------------------------------------|------------|-------------------------------------------------------|----------------------------------------|------------|----------------------------------------|---------------|
|     |                 |                     | $\mu\text{M}$<br>IC <sub>50</sub> | %<br>Eff <sup>2</sup> | $\mu\text{M}$<br>IC <sub>50</sub><br>R | % Eff<br>R | $\mu\text{M}$<br>IC <sub>50</sub><br>G | % Eff<br>G | $\mu\text{M}$<br>IC <sub>50</sub><br>Tox <sup>3</sup> | $\mu\text{M}$<br>IC <sub>50</sub><br>R | %<br>Eff R | $\mu\text{M}$<br>IC <sub>50</sub><br>G | %<br>Eff<br>G |
| 92  | MLS000539207-01 | S9                  | 45                                | -45                   | †                                      | †          | -                                      | -          | -                                                     |                                        |            |                                        |               |
| 93  | MLS000572533-01 | S10                 | 50                                | -43                   | 89                                     | -55        | -                                      | -          | -                                                     |                                        |            |                                        |               |
| 94  | MLS000736244-01 | S11                 | 45                                | -59                   | †                                      | †          | 79                                     | -79        | -                                                     |                                        |            |                                        |               |
| 95  | NCGC00024515-01 | S12                 | 32                                | -42                   | †                                      | †          | -                                      | -          | <0                                                    |                                        |            |                                        |               |
| 96  | NCGC00115021-01 | S13                 | 10                                | -64                   | †                                      | †          | -                                      | -          | -                                                     |                                        |            |                                        |               |
| 97  | NCGC00115357-01 | S14                 | 3*                                | -43                   | †                                      | †          | -                                      | -          | -                                                     |                                        |            |                                        |               |
| 98  | MLS000117623-01 | S15                 | 50                                | -44                   | 45*                                    | -169       | 40*                                    | -128       | -                                                     |                                        |            |                                        |               |
| 99  | NCGC00168026-01 | S16                 | 13                                | -31                   | 25                                     | -73        | 20                                     | -48        | 22                                                    | 39                                     | -51        | 65                                     | -48           |
| 100 | NCGC00164166-01 | S17                 | 112                               | -50                   | 92                                     | -95        | 63                                     | -73        | -                                                     |                                        |            |                                        |               |
| 101 | NCGC00091101-02 | S18                 | 28                                | -23                   | 40                                     | -124       | 16                                     | -75        | 35                                                    |                                        |            |                                        |               |
| 102 | MLS000039785-01 | S19                 | 79                                | -66                   | -                                      | -          | -                                      | -          | -                                                     |                                        |            |                                        |               |
| 103 | MLS000419418-01 | S20                 | 18                                | -38                   | -                                      | -          | 40                                     | -40        | -                                                     |                                        |            |                                        |               |
| 104 | MLS000529158-01 | S21                 | 45                                | -45                   | -                                      | -          | -                                      | -          | -                                                     |                                        |            |                                        |               |
| 105 | MLS000529931-01 | S22                 | 50*                               | -89                   | -                                      | -          | -                                      | -          | -                                                     |                                        |            |                                        |               |
| 106 | MLS000530963-01 | S23                 | 40                                | -49                   | -                                      | -          | -                                      | -          | -                                                     |                                        |            |                                        |               |

Notes. <sup>1</sup>Numbers beginning with S indicate singletons. <sup>2</sup>Percent efficacy is the maximum response as determined by the curve fit of the titration-response data. <sup>3</sup>Activity in cell viability assay. \*TF active indicating possible compound interference. R, FP assay using Texas red fluoroprobe; G, FP assay using fluorescein fluoroprobe; †, active with efficacy <40%; -, Inactive.
